# Supplementary material for: Immunogenicity and Safety of Vaccines against Coronavirus Disease in Actively Treated Patients with Solid Tumors: A Prospective Cohort Study
Source: PubMed Central journal article supplement — Cancer Res Treat. 2023 Feb 9;55(3):746–57. doi: 10.4143/crt.2022.1541 (PMC10372585; doi:10.4143/crt.2022.1541), 2023-02-09
Supplement: crt-2022-1541-Supplementary-Fig-S2.pdf [file crt-2022-1541-Supplementary-Fig-S2.pdf]

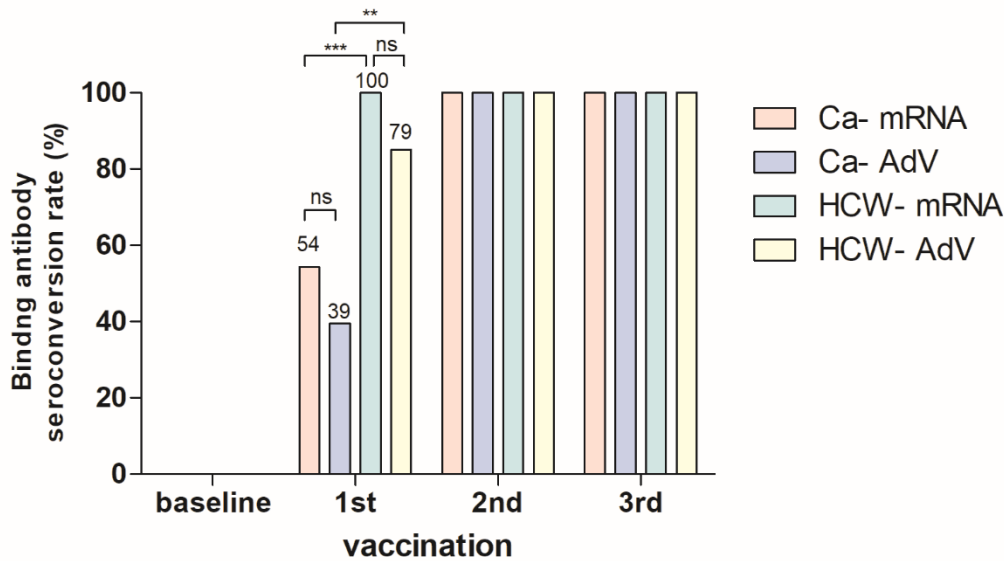

**S2 Fig.** Seroconversion rates following each vaccination. Spike-specific binding antibody seroconversion rates before and after each dose of severe acute respiratory syndrome coronavirus 2 (SARS-CoV-2) vaccination in patients with solid cancers and healthcare workers. Seroconversion rates (%) were compared using the Pearson’s chi-squared test or Fisher’s exact method. The Ca-mRNA group received a primary series of mRNA vaccines (either BNT162b2 or mRNA-1273); the Ca-AdV group received a primary series of adenovirus vector vaccines (AZD1222); HCW-mRNA and HCW-AdV are groups of age-matched healthcare workers who received a primary series of mRNA vaccines and adenovirus vector vaccines, respectively. ns, no significance; \* $p < 0.05$ , \*\* $p < 0.01$ , \*\*\* $p < 0.001$ .
