# Supplementary material for: Immunogenicity and Safety of Vaccines against Coronavirus Disease in Actively Treated Patients with Solid Tumors: A Prospective Cohort Study
Source: PubMed Central journal article supplement — Cancer Res Treat. 2023 Feb 9;55(3):746–57. doi: 10.4143/crt.2022.1541 (PMC10372585; doi:10.4143/crt.2022.1541), 2023-02-09
Supplement: crt-2022-1541-Supplementary-Table-S4.pdf [file crt-2022-1541-Supplementary-Table-S4.pdf]

**S4 Table.** Neutralizing antibody levels against SARS-CoV-2 strains in the vaccinated cancer cohorts

|                            | <b>Wild-type virus</b> | <b>Delta variant</b> | <b>Omicron variant</b> |
|----------------------------|------------------------|----------------------|------------------------|
| 2nd, Ca-mRNA <sup>a)</sup> | 278 (213-363)          | 133 (100-177)        | 12 (9-16)              |
| 2nd, Ca-AdV <sup>b)</sup>  | 256 (350-456)          | 114 (77-169)         | 13 (10-16)             |
| 3rd, Ca-mRNA <sup>c)</sup> | 582 (144-456)          | 397 (219-719)        | 36 (15-88)             |
| 3rd, Ca-AdV <sup>d)</sup>  | 513 (311-845)          | 272 (144-514)        | 14 (8-25)              |

Values are presented as geometric mean titer (95% confidence interval). SARS-CoV-2, severe acute respiratory syndrome coronavirus 2. <sup>a)</sup>Cancer patients who received two doses of mRNA vaccines (either BNT162b2 or mRNA-1273), <sup>b)</sup>Cancer patients who received two doses of adenovirus vector vaccine (AZD1222), <sup>c)</sup>Cancer patients who received three doses of mRNA vaccine (either BNT162b2 or mRNA-1273), <sup>d)</sup>Cancer patients who received two doses of adenovirus vector vaccine (AZD1222) followed with mRNA vaccines (either BNT162b2 or mRNA-1273).
